# Supplementary material
Source: PubMed Central journal article supplement (PMC4349074)
Supplement: supp_114.172809_FigureS1.pdf [file supp_114.172809_FigureS1.pdf]

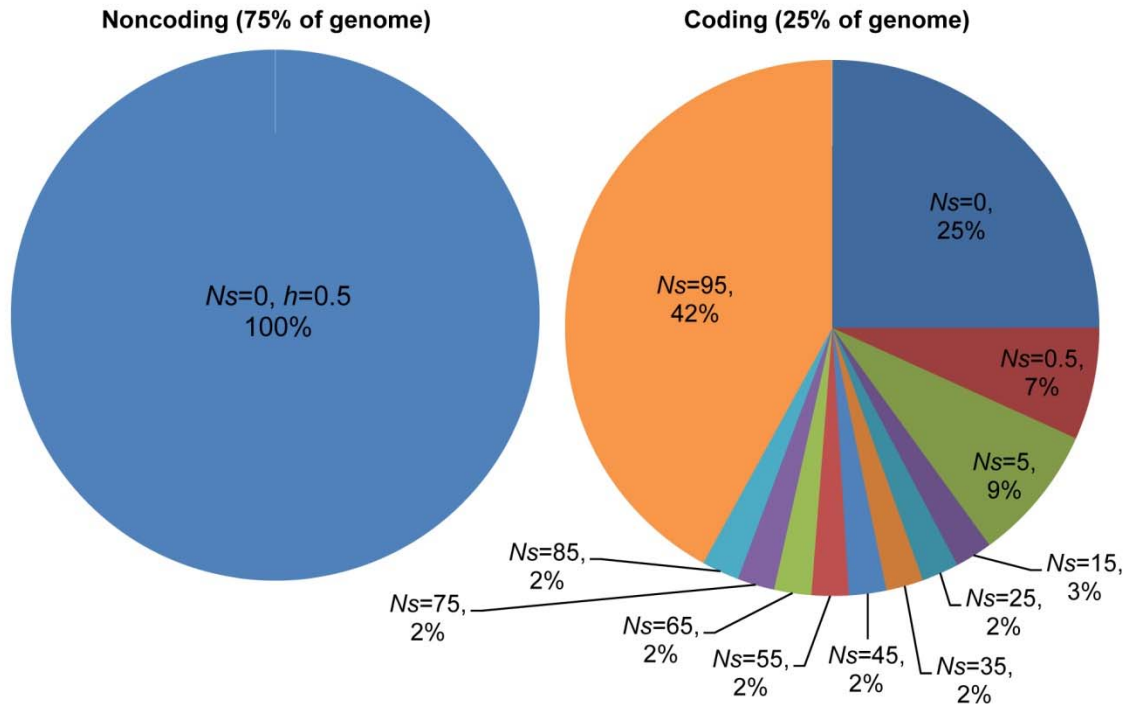

**Figure S1** Genome structure implemented in the simulations. Each genome was 100 Mbp comprised of alternating 800 bp noncoding (NC) and 200 bp coding (C) regions. All sites in NC and 25% of sites in C were neutral with  $h=0.5$  and the remaining 75% of C were under varying selection coefficients.
