# Supplementary material
Source: PubMed Central journal article supplement (PMC4349074)
Supplement: supp_114.172809_TableS1.pdf [file supp_114.172809_TableS1.pdf]

**Table S1** The sample of *Eichhornia paniculata* individuals used for estimating the efficacy of selection in outcrossing and selfing populations

| Code   | Country | Province/ Department   | Nearest City            | Morph structure | Morph <sup>a</sup> |
|--------|---------|------------------------|-------------------------|-----------------|--------------------|
| B179   | Brazil  | Alagoas                | Igaci                   | trimorphic      | S                  |
| B191   | Brazil  | Pernambuco             | Lajedo                  | trimorphic      | M                  |
| B192   | Brazil  | Pernambuco             | Cupira                  | trimorphic      | L                  |
| B194   | Brazil  | Pernambuco             | São Caetano             | trimorphic      | S                  |
| B197   | Brazil  | Pernambuco             | Camocim de<br>Sao Felix | trimorphic      | S                  |
| B199   | Brazil  | Pernambuco             | Caruaru                 | trimorphic      | S                  |
| B202   | Brazil  | Ceará                  | Quixada                 | trimorphic      | M                  |
| B207   | Brazil  | Ceará                  | Choro                   | trimorphic      | L                  |
| B210   | Brazil  | Ceará                  | Canindé                 | trimorphic      | L                  |
| B211   | Brazil  | Ceará                  | Fortaleza               | trimorphic      | M                  |
| C1     | Cuba    | Granma                 | Yara                    | monomorphic     | M'                 |
| C3     | Cuba    | Granma                 | Cholera                 | monomorphic     | M'                 |
| C5     | Cuba    | Las Tunas/ Camagüey    | Camalote                | monomorphic     | M'                 |
| J29    | Jamaica | St. Elizabeth          | Fullerswood             | monomorphic     | M'                 |
| J30    | Jamaica | St. Elizabeth          | Cataboo                 | monomorphic     | M'                 |
| J31    | Jamaica | St. Elizabeth          | Slipe                   | monomorphic     | M'                 |
| J32    | Jamaica | Westmoreland           | Little London           | monomorphic     | M'                 |
| J33    | Jamaica | Westmoreland           | Georges Plain           | monomorphic     | M'                 |
| Mexico | Mexico  | San Mateo del Mar, Nr. | Oaxaca                  | monomorphic     | L'                 |

---

| Tehuantepec |           |       |               |             |    |
|-------------|-----------|-------|---------------|-------------|----|
| Nicaragua   | Nicaragua | Rivas | Rio Las Lajas | monomorphic | L' |

---

<sup>a</sup>L=long-styled morph, L'=selfing variant of the L-morph, M=mid-styled morph, M'=selfing variant of the M-morph, S=short-styled morph. Data from Barrett *et al.* (2009) and Ness *et al.* (2010).
