# Supplementary material
Source: PubMed Central journal article supplement (PMC4349074)
Supplement: supp_114.172809_TableS2.pdf [file supp_114.172809_TableS2.pdf]

**Table S2 Polymorphisms segregating in *Eichhornia paniculata* populations identified in aligned portions of EST-derived nuclear locus EP0314 from Barrett *et al.* (2009) and Ness *et al.* (2010) and the best matching contig from this study**

| Site                                                | 127 | 148 | 177 | 217 | 228 | 262   | 266 | 298 | 634   | 652     | 655   | 733 |
|-----------------------------------------------------|-----|-----|-----|-----|-----|-------|-----|-----|-------|---------|-------|-----|
| Brazil South selfer<br>( $t=0$ ) <sup>a</sup>       | C   | C   | G   | C   | C   | G     | A   | C   | C     | A/C     | C/T   | C/? |
| Brazil South<br>outcrosser ( $t>0.8$ ) <sup>a</sup> | A/C | C/T | G   | C/T | C/G | C/G/T | A/G | C/G | C/T/? | A/C/T/? | C/T/? | C/? |
| Brazil North<br>outcrosser ( $t>0.8$ ) <sup>a</sup> | C   | C   | G   | C   | C   | G     | A   | C   | C/T   | C       | C     | C/? |
| Caribbean ( $t<0.15$ ) <sup>a</sup>                 | A   | C   | A/G | C   | C   | T     | G   | C   | T/C   | C       | C     | C   |
| Central America ( $t=0$ ) <sup>a</sup>              | C   | C   | G   | C   | C   | G     | A   | C   | C/?   | C/?     | C/?   | C/? |
| Brazil_sample1 <sup>b</sup>                         | C   | C   | G   | C   | C   | G     | A   | C   | C     | C       | C     | C   |
| Brazil_sample2 <sup>b</sup>                         | C   | C   | G   | C   | C   | G     | A   | C   | C     | C       | C     | C   |
| Brazil_sample3 <sup>b</sup>                         | C   | C   | G   | C   | C   | G     | A   | C   | T     | C       | C     | C   |
| Brazil_sample4 <sup>b</sup>                         | C   | C   | G   | C   | C   | G     | A   | C   | C     | C       | C     | C   |
| Brazil_sample5 <sup>b</sup>                         | C   | C   | G   | C   | C   | G     | G   | G   | C     | T       | C     | C   |
| Brazil_sample6 <sup>b</sup>                         | C   | C   | G   | C   | C   | G     | A   | C   | C     | C       | C     | C   |
| Brazil_sample7 <sup>b</sup>                         | C   | C   | G   | T   | C   | C     | G   | G   | C     | C       | C     | C   |
| Brazil_sample8 <sup>b</sup>                         | A   | C   | A   | C   | C   | G     | G   | C   | T     | C       | C     | C   |
| Brazil_sample9 <sup>b</sup>                         | C   | C   | G   | C   | C   | G     | A   | C   | C     | C       | C     | C   |
| Brazil_sample10 <sup>b</sup>                        | C   | T   | G   | T   | C   | C     | A   | C   | C     | T       | C     | C   |
| Caribbean_sample1 <sup>b</sup>                      | A   | C   | A   | C   | C   | T     | G   | C   | T     | C       | C     | C   |
| Caribbean_sample2 <sup>b</sup>                      | A   | C   | A   | C   | C   | T     | G   | C   | T     | C       | C     | C   |

|                                         |   |   |   |   |   |   |   |   |   |   |   |   |
|-----------------------------------------|---|---|---|---|---|---|---|---|---|---|---|---|
| Caribbean_sample3 <sup>b</sup>          | A | C | A | C | C | T | G | C | T | C | C | C |
| Caribbean_sample4 <sup>b</sup>          | A | C | A | C | C | T | G | C | T | C | C | C |
| Caribbean_sample5 <sup>b</sup>          | A | C | A | C | C | T | G | C | T | C | C | C |
| Caribbean_sample6 <sup>b</sup>          | A | C | A | C | C | T | G | C | T | C | C | C |
| Caribbean_sample7 <sup>b</sup>          | A | C | A | C | C | T | G | C | T | C | C | C |
| Caribbean_sample8 <sup>b</sup>          | A | C | A | C | C | T | G | C | T | C | C | C |
| Central<br>America_sample1 <sup>b</sup> | C | C | G | C | C | G | A | C | C | C | C | C |
| Central<br>America_sample2 <sup>b</sup> | C | C | G | C | C | G | A | C | C | C | C | G |

<sup>a</sup>Polymorphisms identified in populations sampled in Barrett *et al.* (2009) and Ness *et al.* (2010)

<sup>b</sup>Polymorphisms identified in the 10 outcrossing and 10 selfing populations from this study
