# Supplementary material
Source: PubMed Central journal article supplement (PMC4349074)
Supplement: supp_114.172809_TableS3.pdf [file supp_114.172809_TableS3.pdf]

**Table S3** Nonsynonymous and synonymous diversity of simulated outcrossing and selfing populations under fixed dominance levels for all mutations

| Dominance of mutations ( $h$ ) | Mating system | $\pi_n$  | $\pi_s$  | $\pi_n/\pi_s$ |
|--------------------------------|---------------|----------|----------|---------------|
| 0.2                            | Outcrosser    | 1.63E-05 | 3.51E-05 | 0.46          |
| 0.2                            | Selfer        | 3.82E-06 | 8.75E-06 | 0.44          |
| 0.5                            | Outcrosser    | 1.36E-05 | 3.41E-05 | 0.40          |
| 0.5                            | Selfer        | 3.67E-06 | 8.88E-06 | 0.41          |
| 0.8                            | Outcrosser    | 1.24E-05 | 3.34E-05 | 0.37          |
| 0.8                            | Selfer        | 3.73E-06 | 8.73E-06 | 0.43          |
