# Supplementary material
Source: PubMed Central journal article supplement (PMC4349074)
Supplement: supp_114.172809_TableS4.pdf [file supp_114.172809_TableS4.pdf]

**Table S4** *P*-values from a two-sample *t*-test comparing  $N_e s^a$  categories of simulated outcrossing and selfing populations under fixed dominance levels for all mutations

| Dominance of mutations ( <i>h</i> ) | <1        | 1-10  | 10-100  | >100      |
|-------------------------------------|-----------|-------|---------|-----------|
| 0.2                                 | 0.257     | 0.479 | 0.002** | <0.001*** |
| 0.5                                 | 0.163     | 0.415 | 0.609   | 0.651     |
| 0.8                                 | <0.001*** | 0.181 | 0.030*  | 0.275     |

<sup>a</sup> $N_e s$  is the product of  $N_e$  and the selection coefficient (*s*)

\*Significant at the 5% level

\*\*Significant at the 1% level

\*\*\*Significant at the 0.1% level
