# Supplementary material
Source: PubMed Central journal article supplement (PMC4349074)
Supplement: supp_114.172809_TableS5.pdf [file supp_114.172809_TableS5.pdf]

**Table S5 Two-way analysis of variance comparing the  $N_e s^a$  categories of simulated outcrossing and selfing populations under varying dominance for mutations**

| Factor                       | Degrees of freedom | P-values |        |           |           |
|------------------------------|--------------------|----------|--------|-----------|-----------|
|                              |                    | <1       | 1-10   | 10-100    | >100      |
| Mating system                | 1                  | 0.049*   | 0.012* | <0.001*** | <0.001*** |
| Time ( $N$ )                 | 5                  | 0.011*   | 0.089  | 0.243     | 0.121     |
| Mating system * Time ( $N$ ) | 5                  | 0.011*   | 0.056  | 0.092     | 0.028*    |
| Error                        | 1428               |          |        |           |           |

<sup>a</sup> $N_e s$  is the product of  $N_e$  and the selection coefficient ( $s$ )

\*Significant at the 5% level

\*\*\*Significant at the 0.1% level
