# Supplementary material
Source: PubMed Central journal article supplement (PMC4349074)
Supplement: supp_114.172809_TableS6.pdf [file supp_114.172809_TableS6.pdf]

**Table S6** Counts of nonsynonymous and synonymous invariant sites and minor allele frequency spectra bins summed across loci for eight outcrossing and eight selfing populations of *Eichhornia paniculata*

|                                 | Invariant | 1     | 2    | 3    | 4    |
|---------------------------------|-----------|-------|------|------|------|
| <b>Outcrosser nonsynonymous</b> | 5205480   | 14392 | 3552 | 1702 | 742  |
| <b>Outcrosser synonymous</b>    | 1438285   | 19738 | 6799 | 3933 | 1914 |
| <b>Selfer nonsynonymous</b>     | 5177565   | 2478  | 561  | 402  | 172  |
| <b>Selfer synonymous</b>        | 1454240   | 3562  | 918  | 910  | 340  |
