# Supplementary material
Source: PubMed Central journal article supplement (PMC4349074)
Supplement: supp_114.172809_TableS7.pdf [file supp_114.172809_TableS7.pdf]

**Table S7** Number of loci containing sites heterozygous across multiple selfing populations from the Caribbean

| Sites                                     | Number of loci containing such sites |
|-------------------------------------------|--------------------------------------|
| Heterozygous in two or more populations   | 245                                  |
| Heterozygous in three or more populations | 140                                  |
| Heterozygous in four or more populations  | 113                                  |
| Heterozygous in five or more populations  | 97                                   |
| Heterozygous in six or more populations   | 87                                   |
