# Supplementary material
Source: PubMed Central journal article supplement (PMC4349074)
Supplement: supp_114.172809_TableS8.pdf [file supp_114.172809_TableS8.pdf]

**Table S8** *P*-values from randomisation tests as applied in Keightley and Eyre-Walker (2007) comparing the  $N_e s < 1^a$  category between DFEs of eight outcrossing and eight selfing *Eichhornia paniculata* populations under various filtering conditions

| Comparisons                                                                      | <i>P</i> -values |
|----------------------------------------------------------------------------------|------------------|
| Original, Figure 6                                                               | 0.190            |
| Including sites with QUAL>30, Figure S10                                         | 0.190            |
| Including sites with QUAL>0, Figure S10                                          | 0.267            |
| Excluding 245 loci with sites heterozygous in >1 selfers, Figure S11             | 0.370            |
| Excluding 73 loci with sites violating Hardy-Weinberg in outcrossers, Figure S12 | 0.250            |
| Excluding 135 loci with $\pi_n/\pi_s > 1$ in outcrossers or selfers, Figure S14  | 0.533            |

<sup>a</sup> $N_e s$  is the product of  $N_e$  and the selection coefficient (*s*)
